# Supplementary material for: Comparison of clinical MRI liver iron content measurements using signal intensity ratios, R2 and R2*
Source: PubMed Central journal article supplement (PMC5059419; doi:10.1007/s00261-016-0831-7), 2016-07-18
Supplement: 261_2016_831_MOESM1_ESM.pdf [file 261_2016_831_MOESM1_ESM.pdf]

## Supplementary Material

**Title:** Comparison of clinical MRI liver iron content measurements using signal intensity ratios,  $R_2$  and  $R_2^*$

**Journal name:** Abdominal Radiology

## Supplementary Material S1

### Assessment of three different fit routines for $R_2^*$ analysis

In magnitude images, the noise is distributed in a non-Gaussian manner. This is known as Rician noise (1). At high signal levels the non-zero mean has a negligible effect on the average signal, but near the noise level, a noise bias exists which needs to be taken into account when fitting  $R_2^*$ . We explored three different fit routines: a truncated exponential fit (A), an exponential + constant fit (B) and an exponential + Rician noise (C). In A, data points at or below the noise level were deselected manually in a time-consuming process before fitting the remaining points to a single exponential. This method is used most often in literature (2,3). In B, all data points were fit to a single exponential and a constant factor (4,5). The downside of this method is that it introduces a bias to all points, including high signal points and consequently may overestimate the relaxation rate. In C, all points were fit to a single exponential with a Rician noise factor.

The Rician noise factor was modelled by the expectation value ( $E_R$ ) of the Rice distribution (**eq. 1**), which is subject to two parameters:  $\mu$ , the 'true' (in this case magnitude) value and  $\sigma$ , a noise parameter.  $I_0$  and  $I_1$  are modified Bessel functions of the first kind.

$$E_R(\mu, \sigma) = \sigma \sqrt{\frac{\pi}{2}} e^{-\frac{\mu^2}{4\sigma^2}} \left\{ \left(1 + \frac{\mu^2}{2\sigma^2}\right) I_0\left(\frac{\mu^2}{4\sigma^2}\right) + \frac{\mu^2}{2\sigma^2} I_1\left(\frac{\mu^2}{4\sigma^2}\right) \right\} \quad (1)$$

$$\begin{array}{lll} \mu \gg \sigma & \rightarrow & E_R(\mu, \sigma) = \mu \quad \text{No bias} \\ \mu \ll \sigma & \rightarrow & E_R(\mu, \sigma) = \sigma \sqrt{\frac{\pi}{2}} \quad \text{Maximum bias} \end{array}$$

To get the fit function for  $R_2^*$ , a single exponential is inserted in the place of  $\mu$ , yielding a function (**eq. 2**) with three parameters:  $S_0$ ,  $R_2^*$  and  $\sigma$ :

$$S(TE) = E_R(S_0 e^{-R_2^* \cdot TE}, \sigma) \quad (2)$$

1. Gudbjartsson H, Patz S. The Rician distribution of noisy MRI data. Magn Reson Med 1995;34(6):910-914.
2. Hankins JS, McCarville MB, Loeffler RB, et al. R2\* magnetic resonance imaging of the liver in patients with iron overload. Blood 2009;113:4853-4855.
3. Garbowski MW, Carpenter JP, Smith G, et al. Biopsy-based calibration of T2\* magnetic resonance for estimation of liver iron concentration and comparison with R2 Ferriscan. J Cardiovasc Magn Reson 2014;16:40.
4. Anderson LJ, Holden S, Davis B, et al. Cardiovascular T2-star (T2\*) magnetic resonance for the early diagnosis of myocardial iron overload. Eur Heart J 2001;22:2171-2179.
5. Wood JC, Enriquez C, Ghugre N, et al. MRI R2 and R2\* mapping accurately estimates hepatic iron concentration in transfusion-dependent thalassemia and sickle cell disease patients. Blood 2005;106:1460-1465.

## Supplementary figure

Figure S1. Bland-Altman plots between pairs of observers for the three methods.

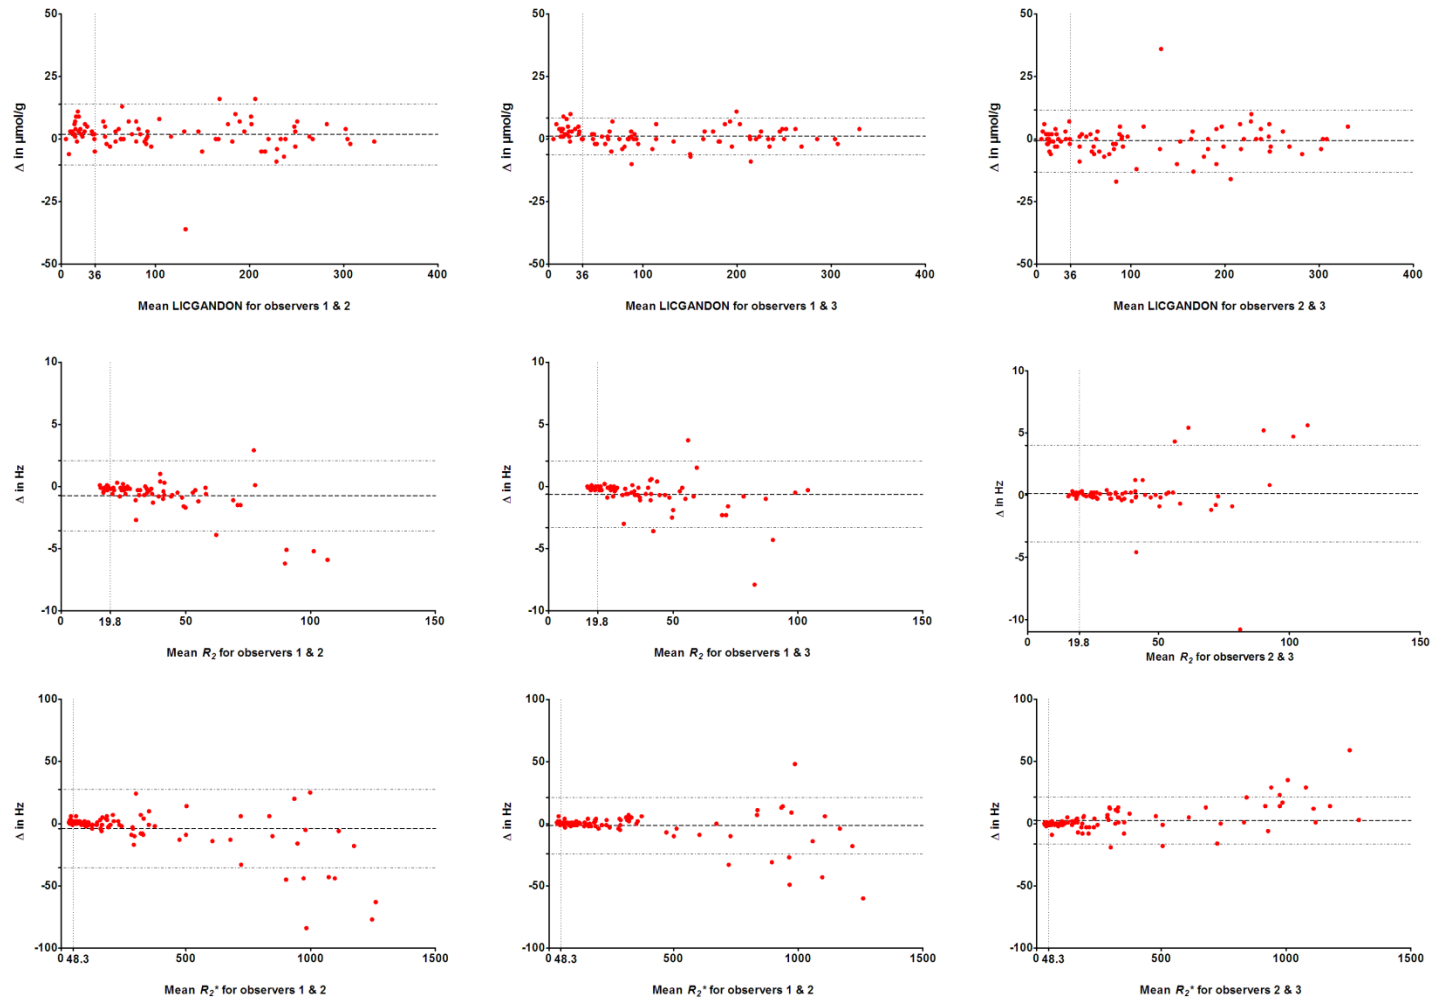

Fig. S1 shows Bland-Altman plots between observer 1 and 2 (*left column*), 1 and 3 (*middle column*) and 2 and 3 (*right column*) for LIC<sub>GANDON</sub> (*top row*), R<sub>2</sub> (*middle row*) and R<sub>2</sub><sup>\*</sup> (*bottom row*). The dotted vertical lines indicate the thresholds for diagnosing elevated LIC.
